# Supplementary material for: A review of hetero-structured Ni-based active catalysts for urea electrolysis
Source: Royal Society of Chemistry journal article supplement (doi:10.1039/d2ta00120a), 2022-01-01
Supplement: d2ta00120a1.pdf [file d2ta00120a1.pdf]

## Electronic Supplementary Information

### **A review of hetero-structured Ni-based active catalysts for urea electrolysis**

Jiaxin Li<sup>ab</sup>, Shuli Wang<sup>b</sup>, Sijia Sun<sup>a</sup>, Xiang Wu<sup>c</sup>, Baogang Zhang<sup>\*a</sup> and Ligang Feng<sup>\*b</sup>

<sup>a</sup> School of Water Resources and Environment, MOE Key Laboratory of Groundwater Circulation and Environmental Evolution, China University of Geosciences (Beijing), Beijing 100083, P. R.

China. E-mail: baogangzhang@cugb.edu.cn

<sup>b</sup> School of Chemistry and Chemical Engineering, Yangzhou University, Yangzhou 225002, P. R.

China. E-mail: ligang.feng@yzu.edu.cn; fenglg11@gmail.com

<sup>c</sup> School of Materials Science and Engineering, Shenyang University of Technology, Shenyang

110870, Liaoning, China

Table S1. Proposed reaction mechanisms for urea electrooxidation reaction (M=NiOOH).<sup>1</sup>  
 Copyright (2010) American Chemical Society.

| Steps  | Reaction pathway                                                                                                                                                                              |
|--------|-----------------------------------------------------------------------------------------------------------------------------------------------------------------------------------------------|
| Path 1 |                                                                                                                                                                                               |
| 1      | $\text{CO}(\text{NH}_2)_2 + \text{M} \rightarrow [\text{M}\cdot\text{CO}(\text{NH}_2)_2]_{\text{ads}}$                                                                                        |
| 2      | $[\text{M}\cdot\text{CO}(\text{NH}_2)_2]_{\text{ads}} + \text{OH}^- \rightarrow [\text{M}\cdot\text{CO}(\text{NH}_2\cdot\text{NH})]_{\text{ads}} + \text{H}_2\text{O} + \text{e}^{-\text{a}}$ |
| 3      | $[\text{M}\cdot\text{CO}(\text{NH}_2\cdot\text{NH})]_{\text{ads}} + \text{OH}^- \rightarrow [\text{M}\cdot\text{CONH}_2\text{N}]_{\text{ads}} + \text{H}_2\text{O} + \text{e}^{-\text{a}}$    |
| 4      | $[\text{M}\cdot\text{CO}(\text{NH}_2\text{N})]_{\text{ads}} + \text{OH}^- \rightarrow [\text{M}\cdot\text{CONHN}]_{\text{ads}} + \text{H}_2\text{O} + \text{e}^{-\text{a}}$                   |
| 5      | $[\text{M}\cdot\text{CONHN}]_{\text{ads}} + \text{OH}^- \rightarrow [\text{M}\cdot\text{CO}\cdot\text{N}_2]_{\text{ads}} + \text{H}_2\text{O} + \text{e}^{-\text{a}}$                         |
| 6      | $[\text{M}\cdot\text{CO}\cdot\text{N}_2]_{\text{ads}} + \text{OH}^- \rightarrow [\text{M}\cdot\text{CO}\cdot\text{OH}]_{\text{ads}} + \text{N}_2 + \text{e}^-$                                |
| 7      | $[\text{M}\cdot\text{CO}\cdot\text{OH}]_{\text{ads}} + \text{OH}^- \rightarrow [\text{M}\cdot\text{CO}_2]_{\text{ads}} + \text{H}_2\text{O} + \text{e}^-$                                     |
| 8      | $[\text{M}\cdot\text{CO}_2]_{\text{ads}} \rightarrow \text{M} + \text{CO}_2$                                                                                                                  |
| Path 2 |                                                                                                                                                                                               |
| 1      | $\text{CO}(\text{NH}_2)_2 + \text{M} \rightarrow [\text{M}\cdot\text{CO}(\text{NH}_2)_2]_{\text{ads}}$                                                                                        |
| 2      | $[\text{M}\cdot\text{CO}(\text{NH}_2)_2]_{\text{ads}} + \text{OH}^- \rightarrow [\text{M}\cdot\text{CO}(\text{NH}_2\cdot\text{NH})]_{\text{ads}} + \text{H}_2\text{O} + \text{e}^{-\text{b}}$ |
| 3      | $[\text{M}\cdot\text{CO}(\text{NH}_2\cdot\text{NH})]_{\text{ads}} + \text{OH}^- \rightarrow [\text{M}\cdot\text{CONH}_2\text{N}]_{\text{ads}} + \text{H}_2\text{O} + \text{e}^{-\text{b}}$    |
| 4      | $[\text{M}\cdot\text{CO}(\text{NH}_2\text{N})]_{\text{ads}} + \text{OH}^- \rightarrow [\text{M}\cdot\text{CONHN}]_{\text{ads}} + \text{H}_2\text{O} + \text{e}^{-\text{b}}$                   |
| 5      | $[\text{M}\cdot\text{CO}\cdot\text{NHN}]_{\text{ads}} + \text{OH}^- \rightarrow [\text{M}\cdot\text{CO}\cdot\text{N}_2]_{\text{ads}} + \text{H}_2\text{O} + \text{e}^{-\text{b}}$             |
| 6      | $[\text{M}\cdot\text{CO}\cdot\text{N}_2]_{\text{ads}} + \text{OH}^- \rightarrow [\text{M}\cdot\text{CO}\cdot\text{OH}]_{\text{ads}} + \text{N}_2 + \text{e}^-$                                |
| 7      | $[\text{M}\cdot\text{CO}\cdot\text{OH}]_{\text{ads}} + \text{OH}^- \rightarrow [\text{M}\cdot\text{CO}_2]_{\text{ads}} + \text{H}_2\text{O} + \text{e}^-$                                     |
| 8      | $[\text{M}\cdot\text{CO}_2]_{\text{ads}} \rightarrow \text{M} + \text{CO}_2$                                                                                                                  |
| Path 3 |                                                                                                                                                                                               |
| 1      | $\text{CO}(\text{NH}_2)_2 + \text{M} \rightarrow [\text{M}\cdot\text{CO}(\text{NH}_2)_2]_{\text{ads}}$                                                                                        |
| 2      | $[\text{M}\cdot\text{CO}(\text{NH}_2)_2]_{\text{ads}} + \text{OH}^- \rightarrow [\text{M}\cdot\text{CO}(\text{NH}_2\cdot\text{NH})]_{\text{ads}} + \text{H}_2\text{O} + \text{e}^{-\text{b}}$ |
| 3      | $[\text{M}\cdot\text{CO}\cdot\text{NH}_2\text{NH}]_{\text{ads}} + \text{OH}^- \rightarrow [\text{M}\cdot\text{CONH}\cdot\text{NH}]_{\text{ads}} + \text{H}_2\text{O} + \text{e}^{-\text{b}}$  |
| 4      | $[\text{M}\cdot\text{CO}\cdot\text{NHNH}]_{\text{ads}} + \text{OH}^- \rightarrow \text{M}\cdot\text{CO} + \text{NH}\cdot\text{N} + \text{H}_2\text{O} + \text{e}^{-\text{b}}$                 |
| 5      | $[\text{M}\cdot\text{CO}\cdot\text{NHN}]_{\text{ads}} + \text{OH}^- \rightarrow \text{M}\cdot\text{CO}\cdot\text{N}_2 + \text{H}_2\text{O} + \text{e}^{-\text{b}}$                            |
| 6      | $[\text{M}\cdot\text{CO}\cdot\text{N}_2]_{\text{ads}} + \text{OH}^- \rightarrow [\text{M}\cdot\text{CO}\cdot\text{OH}]_{\text{ads}} + \text{N}_2 + \text{e}^-$                                |
| 7      | $[\text{M}\cdot\text{CO}\cdot\text{OH}]_{\text{ads}} + \text{OH}^- \rightarrow [\text{M}\cdot\text{CO}_2]_{\text{ads}} + \text{H}_2\text{O} + \text{e}^-$                                     |
| 8      | $[\text{M}\cdot\text{CO}_2]_{\text{ads}} \rightarrow \text{M} + \text{CO}_2$                                                                                                                  |

<sup>a</sup> Loss of protons from H1-N1-H2 amine group of urea.

<sup>b</sup> Loss of protons from H3-N2-H4 amine group of urea.

Table S2. Sum of free energies for all the intermediate steps (M=NiOOH).<sup>1</sup> Copyright (2010) American Chemical Society.

| Reactions                                                                                                                                                                            | $\Delta G/\text{kJ mol}^{-1}$ |
|--------------------------------------------------------------------------------------------------------------------------------------------------------------------------------------|-------------------------------|
| $\text{CO}(\text{NH}_2)_2 + \text{M} \rightarrow [\text{M}\cdot\text{CO}(\text{NH}_2)_2]_{\text{ads}}$                                                                               | 66.2                          |
| $[\text{M}\cdot\text{CO}(\text{NH}_2)_2]_{\text{ads}} + \text{OH}^- \rightarrow [\text{M}\cdot\text{CO}(\text{NH}_2\cdot\text{NH})]_{\text{ads}} + \text{H}_2\text{O} + 1\text{e}^-$ | -28.9                         |
| $[\text{M}\cdot\text{CO}(\text{NH}_2\cdot\text{NH})]_{\text{ads}} + \text{OH}^- \rightarrow [\text{M}\cdot\text{CONH}_2\text{N}]_{\text{ads}} + \text{H}_2\text{O} + 1\text{e}^-$    | -185.1                        |
| $[\text{M}\cdot\text{CO}(\text{NH}_2\text{N})]_{\text{ads}} + \text{OH}^- \rightarrow [\text{M}\cdot\text{CONHN}]_{\text{ads}} + \text{H}_2\text{O} + 1\text{e}^-$                   | 75.4                          |
| $[\text{M}\cdot\text{CONHN}]_{\text{ads}} + \text{OH}^- \rightarrow [\text{M}\cdot\text{CO}\cdot\text{N}_2]_{\text{ads}} + \text{H}_2\text{O} + 1\text{e}^-$                         | -178.2                        |
| $[\text{M}\cdot\text{CO}\cdot\text{N}_2]_{\text{ads}} + \text{OH}^- \rightarrow [\text{M}\cdot\text{CO}\cdot\text{OH}]_{\text{ads}} + \text{N}_2 + 1\text{e}^-$                      | 392.7                         |
| $[\text{M}\cdot\text{CO}\cdot\text{OH}]_{\text{ads}} + \text{OH}^- \rightarrow [\text{M}\cdot\text{CO}_2]_{\text{ads}} + \text{H}_2\text{O} + 1\text{e}^-$                           | -156.6                        |
| $[\text{M}\cdot\text{CO}_2]_{\text{ads}} \rightarrow \text{M} + \text{CO}_2$                                                                                                         | 1242.2                        |
| Total                                                                                                                                                                                | 1227.7                        |

Table S3. The catalytic properties of Ni-based catalysts for UOR

| Catalyst                              | Electrolyte           | Scan rate<br>/mV s <sup>-1</sup> | Onset potential     | Peak current density<br>/ mA cm <sup>-2</sup> | Potential at 10<br>mA cm <sup>-2</sup> /V | Ref. |
|---------------------------------------|-----------------------|----------------------------------|---------------------|-----------------------------------------------|-------------------------------------------|------|
| Part A: Monometallic Ni catalyst      |                       |                                  |                     |                                               |                                           |      |
| ERGO-Ni                               | 1 M KOH+0.33 M urea   | 10                               | -                   | 35@0.7 vs. Hg/HgO                             | -                                         | 2    |
| Ni decorated graphene                 | 1 M KOH+2 M urea      | 50                               | -                   | 150@0.8 V vs. Ag/AgCl                         | -                                         | 3    |
| Gr/Ni                                 | 1 M KOH+0.33 M urea   | 50                               | 0.38 V vs. Ag/AgCl  | 81.65@0.9 V vs. Ag/AgCl                       | -                                         | 4    |
| Ni-WC/MWCNT                           | 1 M KOH+0.33 M urea   | 10                               | -                   | 46.6@0.7 vs. Hg/HgO                           | -                                         | 5    |
| Ni-MOF(BTC)/CP                        | 1 M KOH+1 M urea      | 5                                | 1.34 V vs. RHE      | 63.15@1.5 V vs. RHE                           | -                                         | 6    |
| Ni-MOF                                | 1 M KOH+0.33 M urea   | 10                               | -                   | 120@1.6 V vs. RHE                             | 1.36 V vs. RHE                            | 7    |
| Ni-MOF-0.5                            | 1 M KOH+0.5 M urea    | 5                                | -                   | -                                             | 1.381 V vs. RHE                           | 8    |
| Ni@carbon sponge                      | 5 M NaOH+1 M urea     | 15                               | 0.24 V vs. Ag/AgCl  | 290@0.47 V vs. Ag/AgCl                        | -                                         | 9    |
| Part B: NiO catalyst                  |                       |                                  |                     |                                               |                                           |      |
| NiO/NF                                | 8 M NaOH+0.1 M urea   | 10                               | 0.3 V vs. Ag/AgCl   | 222@0.48 V vs. Ag/AgCl                        | -                                         | 10   |
| NiO/Gt                                | 0.5 M NaOH+0.3 M urea | 10                               | 0.345 V vs. Ag/AgCl | 17.63@0.64 V vs.<br>Ag/AgCl                   | -                                         | 11   |
| NiO-CFs                               | 1 M KOH+1 M urea      | 25                               | -                   | 61.06@0.45 V vs.<br>Ag/AgCl                   | -                                         | 12   |
| Ultrafine NiO                         | 1 M KOH+0.25 M urea   | 20                               | -                   | 15.34@0.45 V vs.<br>Ag/AgCl                   | -                                         | 13   |
| C@NiO                                 | 1 M KOH+0.33 M urea   | -                                | -                   | 25@1.46 V vs. RHE                             | 1.36 V vs. RHE                            | 14   |
| Part C: Ni(OH) <sub>2</sub> catalyst  |                       |                                  |                     |                                               |                                           |      |
| Ni(OH) <sub>2</sub> @NF               | 1 M KOH+0.33 M urea   | 5                                | -                   | -                                             | 1.35 V vs. RHE                            | 15   |
| Ni(OH) <sub>2</sub> /Ni foam          | 5 M KOH+0.6 M urea    | 10                               | 0.21 V vs. Ag/AgCl  | 337@0.45 V vs. Ag/AgCl                        | -                                         | 16   |
| Porous Ni(OH) <sub>2</sub> nanosheets | 1 M KOH+0.33 M urea   | 20                               | -                   | 298@1.82 V vs. RHE                            | -                                         | 17   |
| SL Ni(OH) <sub>2</sub> NS/CC          | 1 M KOH+0.33 M urea   | 10                               | -                   | 436.4@0.5 V vs. Ag/AgCl                       | -                                         | 18   |

|                                                              |                     |     |                    |                        |                                                 |    |
|--------------------------------------------------------------|---------------------|-----|--------------------|------------------------|-------------------------------------------------|----|
| Ni(OH) <sub>2</sub> -NSs/CC                                  | 1 M KOH+0.5 M urea  | 5   | 1.31 V vs. RHE     | -                      | 1.32 V vs. RHE                                  | 19 |
| β-Ni(OH) <sub>2</sub> -CNTs                                  | 1 M KOH+0.33 M urea | 10  | 0.32 V vs. SCE     | 98.5@0.58 V vs. SCE    | -                                               | 20 |
| Ni(OH) <sub>2</sub> NS@NW/Ni foam                            | 1 M KOH+0.33 M urea | 5   | -                  | -                      | 0.34 V vs. SCE                                  | 21 |
| Part D: Hetero-element doped                                 |                     |     |                    |                        |                                                 |    |
| Ni-based catalyst                                            |                     |     |                    |                        |                                                 |    |
| Rh-NCs/NiO-NSs                                               | 1 M KOH+0.33 M urea | 50  | -                  | 52.05@1.5 V vs. RHE    | -                                               | 22 |
| NiIr-MOF/NF                                                  | 1 M KOH+0.5 M urea  | 5   | 1.32 V vs. RHE     | 100@1.349 V vs. RHE    | -                                               | 23 |
| Fe: α-Ni(OH) <sub>2</sub> /NF                                | 1 M KOH+0.33 M urea | 50  | 1.312 V vs. RHE    | 211.4@1.5 V vs. RHE    | -                                               | 24 |
| Fe <sub>11.1%</sub> -Ni <sub>3</sub> S <sub>2</sub> /Ni foam | 1 M KOH+0.33 M urea | 2   | -                  | -                      | 0.284 V vs. SCE                                 | 25 |
| Co <sub>0.26</sub> -Ni(OH) <sub>2</sub> NPs/CF               | 1 M KOH+0.5 M urea  | 5   | 1.27 V vs. RHE     | -                      | 1.38 V vs. RHE<br>(at 100 mA cm <sup>-2</sup> ) | 26 |
| NiCoPO                                                       | 1 M KOH+0.1 M urea  | 100 | 0.22 V vs. Ag/AgCl | 65.4@0.6 V vs. Ag/AgCl | -                                               | 27 |
| Mo-doped Ni <sub>3</sub> S <sub>2</sub>                      | 1 M KOH+0.3 M urea  | 2   | -                  | -                      | 1.33 V vs. RHE                                  | 28 |
| Mn-Ni <sub>3</sub> S <sub>2</sub> /NF-0.2                    | 1 M KOH+0.5 M urea  | 1   | -                  | -                      | 1.303 V vs. RHE                                 | 29 |
| 1% Ce:α-Ni(OH) <sub>2</sub> /NF                              | 1 M KOH+0.33 M urea | 50  | 1.294 V vs. RHE    | 579.5@1.8 V vs. RHE    | -                                               | 30 |
| V-Ni <sub>3</sub> N/NF                                       | 1 M KOH+0.5 M urea  | 2   | -                  | -                      | 1.361 V vs. RHE                                 | 31 |
| Ni@NCNT-3                                                    | 1 M KOH+0.5 M urea  | -   | -                  | 45.8@1.5 V vs. RHE     | 1.38 V vs. RHE                                  | 32 |
| Ni/SiO <sub>x</sub> /N-C                                     | 1 M KOH+0.33 M urea | 5   | -                  | -                      | 1.384 V vs. RHE                                 | 33 |
| NiFe/N-C                                                     | 1 M KOH+1 M urea    | 5   | -                  | 100@1.37 V vs. RHE     | 1.37 V vs. RHE<br>(at 100 mA cm <sup>-2</sup> ) | 34 |
| Ni(OH) <sub>2</sub> /F-doped Ni <sub>3</sub> S <sub>2</sub>  | 1 M KOH+0.33 M urea | 50  | -                  | 322.9@1.7 V vs. RHE    | -                                               | 35 |
| Part E: Hetero-metallic alloy Ni-                            |                     |     |                    |                        |                                                 |    |
| based catalyst (i) Metal alloy                               |                     |     |                    |                        |                                                 |    |
| Ni <sub>90</sub> Pt <sub>10</sub> /C                         | 1 M KOH+0.33 M urea | 20  | 0.35 V vs. Hg/HgO  | -                      | -                                               | 36 |
| Ni <sub>(10%)</sub> Pd <sub>(10%)</sub> /OMC                 | 1 M KOH+0.33 M urea | 5   | 1.33 V vs. RHE     | -                      | 1.346 V vs. RHE<br>(at 30 mA cm <sup>-2</sup> ) | 37 |

|                                                |                      |    |                    |                          |                                                  |    |
|------------------------------------------------|----------------------|----|--------------------|--------------------------|--------------------------------------------------|----|
| Ni <sub>91</sub> Rh <sub>9</sub> /C            | 1 M KOH+0.1 M urea   | 10 | -                  | 184@0.5 V vs. SCE        | -                                                | 38 |
| Ni-Rh/Ni foam                                  | 1 M KOH+0.05 M urea  | 10 | 0.33 V vs. Ag/AgCl | 131.9@0.53 V vs. Ag/AgCl | -                                                | 39 |
| NiFe hollow cages                              | 1 M KOH+0.5 M urea   | 5  | -                  | 100@1.40 V vs. RHE       | 1.37 V vs. RHE                                   | 40 |
| NP-Ni <sub>0.7</sub> Fe <sub>0.3</sub> Ni foam | 1 M KOH+0.33 M urea  | 5  | -                  | -                        | 1.33 V vs. RHE                                   | 41 |
| Ni-Co alloy nanowire arrays                    | 1 M KOH+0.33 M urea  | 10 | 0.372 V vs. Hg/HgO | 322.82@0.65 vs. Hg/HgO   | -                                                | 42 |
| NiCo MOF/NF                                    | 1 M KOH+0.33 M urea  | -  | -                  | -                        | 1.28 V vs. RHE                                   | 43 |
| Ni <sub>2</sub> Mo <sub>1</sub> /G             | 1 M KOH+0.33 M urea  | 10 | 0.39 V vs. Ag/AgCl | 128@0.53 V vs. Ag/AgCl   | -                                                | 44 |
| Ni-Mo nanotube                                 | 1 M KOH+0.1 M urea   | 5  | -                  | -                        | 1.36 V vs. RHE                                   | 45 |
| Ni/Sn dendrites                                | 1 M KOH+0.33 M urea  | 10 | 0.34 V vs. Ag/AgCl | 44@0.55 V vs. Ag/AgCl    | -                                                | 46 |
| NiFeMo                                         | 1 M KOH+0.33 M urea  | 5  | -                  | 152@1.5 V vs. RHE        | 1.38 V vs. RHE                                   | 47 |
| NiCoMo/graphene                                | 1 M KOH+0.33 M urea  | 1  | 0.3 V vs. Ag/AgCl  | 69.8@0.55 V vs. Ag/AgCl  | 1.32 V vs. RHE                                   | 48 |
| (ii) Nonmetal alloy                            |                      |    |                    |                          |                                                  |    |
| Ni <sub>3</sub> N/rGO@NF-350                   | 1 M KOH+0.5 M urea   | 5  | -                  | -                        | 1.342 V vs. RHE                                  | 49 |
| Ni <sub>3</sub> N/NF                           | 1 M KOH+0.5 M urea   | -  | -                  | -                        | 1.34 V vs. RHE                                   | 50 |
| Ni <sub>3</sub> N-350/NF                       | 1 M KOH+0.5 M urea   | 5  | -                  | -                        | 1.34 V vs. RHE                                   | 51 |
| Ni <sub>3</sub> N NA/CC                        | 1 M KOH+0.33 M urea  | 5  | -                  | -                        | 1.35 V vs. RHE                                   | 52 |
| Ni <sub>2</sub> P-C                            | 1 M KOH+0.33 M urea  | 10 | -                  | 70.4@0.5 V vs. SCE       | -                                                | 53 |
| a-Ni <sub>2</sub> P/G                          | 1 M KOH+0.5 M urea   | 5  | -                  | 209.1@1.7 V vs. RHE      | 1.28 V vs. RHE                                   | 54 |
| P-NF                                           | 1 M KOH+0.33 M urea  | 5  | -                  | -                        | 1.32 V vs. RHE                                   | 55 |
| Ni-P                                           | 1 M KOH+0.33 M urea  | 10 | 1.37 V vs. RHE     | 70@1.5 V vs. RHE         | -                                                | 56 |
| Ni <sub>2</sub> P NF/CC                        | 1 M KOH+0.5 M urea   | 5  | -                  | -                        | 0.447 V vs. SCE<br>(at 100 mA cm <sup>-2</sup> ) | 57 |
| Ni <sub>3</sub> S <sub>2</sub> /MWCNTs/NF      | 1 M KOH+0.5 M urea   | 5  | -                  | -                        | 1.338 V vs. RHE                                  | 58 |
| β-NiS                                          | 1 M KOH+0.33 M urea  | 5  | -                  | -                        | 1.4 V vs. RHE                                    | 59 |
| Ni <sub>3</sub> S <sub>2</sub> @NF             | 1 M NaOH+0.33 M urea | 5  | -                  | -                        | 0.36 V vs. SCE                                   | 60 |

|                                                           |                      |    |                    |                        |  |                                                |    |
|-----------------------------------------------------------|----------------------|----|--------------------|------------------------|--|------------------------------------------------|----|
|                                                           |                      |    |                    |                        |  | (at 100 mA cm <sup>-2</sup> )                  |    |
| Ni <sub>3</sub> Se <sub>4</sub>                           | 1 M KOH+0.1 M urea   | 5  | -                  | -                      |  | 1.38 V vs. RHE                                 | 61 |
| Ni <sub>0.85</sub> Se/rGO                                 | 1 M KOH+0.5 M urea   | 5  | -                  | -                      |  | 1.36 V vs. RHE                                 | 62 |
| NiSe <sub>2</sub>                                         | 1 M KOH+0.33 M urea  | 5  | -                  | -                      |  | 1.36 V vs. RHE                                 | 63 |
| Part F: Multi-component heterostructure Ni-based catalyst |                      |    |                    |                        |  |                                                |    |
| Ni/NiO@NC                                                 | 1 M KOH+0.33 M urea  | 5  | -                  | -                      |  | 1.35 V vs. RHE                                 | 64 |
| Ni/NiO-N-C-500                                            | 1 M KOH+0.33 M urea  | 10 | 1.38 V vs. RHE     | 117.9@1.56 V vs. RHE   |  | -                                              | 65 |
| Ni-NiO/Gr                                                 | 1 M KOH+0.33 M urea  | 10 | -                  | 38.24@0.5 V vs. SCE    |  | -                                              | 66 |
| Ni@C-V <sub>2</sub> O <sub>3</sub> /NF                    | 1 M KOH+0.5 M urea   | 5  | -                  | -                      |  | 1.32 V vs. RHE                                 | 67 |
| (Ni-WO <sub>2</sub> )@C/NF                                | 1 M KOH+0.5 M urea   | -  | 1.30 V vs. RHE     | -                      |  | 1.31 V vs. RHE                                 | 68 |
| Ni <sub>3</sub> S <sub>2</sub> /Ni/NF                     | 1 M KOH+0.5 M urea   | -  | -                  | -                      |  | 1.30 V vs. RHE                                 | 69 |
| Ni-Ni <sub>3</sub> P@NPC/rGO                              | 1 M KOH+0.5 M urea   | 5  | -                  | -                      |  | 1.38V vs. RHE<br>(at 50 mA cm <sup>-2</sup> )  | 70 |
| NiSe <sub>2</sub> -NiO 350                                | 1 M KOH+0.33 M urea  | 10 | 1.315 V vs. RHE    |                        |  | 1.33 V vs. RHE                                 | 71 |
| NiO/NiCr <sub>2</sub> O <sub>4</sub>                      | 1 M KOH+0.33 M urea  | 5  | -                  | 49.7@0.5 V vs. Ag/AgCl |  | -                                              | 72 |
| NiO-Fe <sub>2</sub> O <sub>3</sub> /rGO/PVA               | 1 M KOH+0.33 M urea  | 20 | -                  | 44.6@0.5 V vs. Ag/AgCl |  | -                                              | 73 |
| CoN/Ni(OH) <sub>2</sub>                                   | 1 M KOH+0.5 M urea   | 5  | -                  | -                      |  | 1.33 V vs. RHE<br>(at 50 mA cm <sup>-2</sup> ) | 74 |
| Ni(OH) <sub>2</sub> -NiS-CC                               | 1 M NaOH+0.05 M urea | 10 | 0.31 V vs. Ag/AgCl | 87.5@0.8 V vs. Ag/AgCl |  | -                                              | 75 |
| NiTe <sub>2</sub> /Ni(OH) <sub>2</sub> /CFC               | 1 M KOH+0.33 M urea  | 2  | 1.355 V vs. RHE    | 73@1.523 V vs. RHE     |  | -                                              | 76 |
| Ni <sub>4</sub> N/Cu <sub>3</sub> N                       | 1 M KOH+0.5 M urea   | 5  | -                  | -                      |  | 1.34 V vs. RHE                                 | 77 |
| NiF <sub>2</sub> /Ni <sub>2</sub> P                       | 1 M KOH+0.33 M urea  | 10 | 1.32 V vs. RHE     | 157.35@1.53 V vs. RHE  |  | -                                              | 78 |
| NiF <sub>3</sub> /Ni <sub>2</sub> P@CC-2                  | 1 M KOH+0.33 M urea  | 10 | 1.33 V vs. RHE     | 122@1.6 V vs. RHE      |  | 1.36 V vs. RHE                                 | 79 |
| Ni <sub>2</sub> P/Fe <sub>2</sub> P/NF                    | 1 M KOH+0.5 M urea   | 10 | -                  | -                      |  | 1.36 V vs. RHE                                 | 80 |
| MNPBA-P                                                   | 1 M KOH+0.5 M urea   | 20 | -                  | -                      |  | 1.344 V vs. RHE                                | 81 |

|                                                           |                     |    |                |                       |                                                 |    |
|-----------------------------------------------------------|---------------------|----|----------------|-----------------------|-------------------------------------------------|----|
| Ni <sub>12</sub> P <sub>5</sub> /Ni-Pi/NF                 | 1 M KOH+0.5 M urea  | 5  | -              | 900@1.378 V vs. RHE   | -                                               | 82 |
| N-NiS/NiS <sub>2</sub>                                    | 1 M KOH+0.33 M urea | 10 | -              | -                     | 1.47 V vs. RHE<br>(at 100 mA cm <sup>-2</sup> ) | 83 |
| NiS/MoS <sub>2</sub> @FCP                                 | 1 M KOH+0.4 M urea  | 5  | -              | -                     | 1.42 V vs. RHE<br>(at 50 mA cm <sup>-2</sup> )  | 84 |
| NiS <sub>2</sub> -MoS <sub>2</sub>                        | 1 M KOH+0.33 M urea | 10 | 1.33 V vs. RHE | 103.41@1.54 V vs. RHE | -                                               | 85 |
| Cu <sub>2</sub> S@Ni <sub>3</sub> Se <sub>2</sub>         | 1 M KOH+0.5 M urea  | 5  | -              | -                     | 1.338 V vs. RHE                                 | 86 |
| NiS@Ni <sub>3</sub> S <sub>2</sub> /NiMoO <sub>4</sub>    | 1 M KOH+0.5 M urea  | 2  | -              | -                     | 1.30 V vs. RHE                                  | 87 |
| MoNi <sub>4</sub> /MoOx@NF                                | 1 M KOH+0.33 M urea | 10 | -              | -                     | 1.29 V vs. RHE                                  | 88 |
| FeNi <sub>3</sub> -MoO <sub>2</sub>                       | 1 M KOH+0.5 M urea  | -  | -              | -                     | 1.29 V vs. RHE                                  | 89 |
| Ni-NiO-Mo <sub>0.84</sub> Ni <sub>0.16</sub> /NF          | 1 M KOH+0.5 M urea  | 5  | 1.29 V vs. RHE | -                     | 1.33 V vs. RHE<br>(at 50 mA cm <sup>-2</sup> )  | 90 |
| Ni/Ni <sub>0.2</sub> Mo <sub>0.8</sub> N/MoO <sub>3</sub> | 1 M KOH+0.5 M urea  | 2  | -              | -                     | 1.349 V vs. RHE                                 | 91 |



## References

1. D. A. Daramola, D. Singh and G. G. Botte, *J. Phys. Chem. A*, 2010, **114**, 11513-11521.
2. D. Wang, W. Yan, S. H. Vijapur and G. G. Botte, *Electrochim. Acta*, 2013, **89**, 732-736.
3. N. A. M. Barakat, M. Motlak, Z. K. Ghouri, A. S. Yasin, M. H. El-Newehy and S. S. Al-Deyab, *J. Mol. Catal. A: Chem.*, 2016, **421**, 83-91.
4. A. Yousef, M. H. El-Newehy, S. S. Al-Deyab and N. A. M. Barakat, *Arab. J. Chem.*, 2017, **10**, 811-822.
5. L. Wang, T. Du, J. Cheng, X. Xie, B. Yang and M. Li, *J. Power. Sources*, 2015, **280**, 550-554.
6. V. Maruthapandian, S. Kumaraguru, S. Mohan, V. Saraswathy and S. Muralidharan, *ChemElectroChem*, 2018, **5**, 2795-2807.
7. D. Zhu, C. Guo, J. Liu, L. Wang, Y. Du and S.-Z. Qiao, *Chem. Commun.*, 2017, **53**, 10906-10909.
8. S. Zheng, Y. Zheng, H. Xue and H. Pang, *Chem. Eng. J.*, 2020, **395**, 125166.
9. K. Ye, D. Zhang, F. Guo, K. Cheng, G. Wang and D. Cao, *J. Power. Sources*, 2015, **283**, 408-415.
10. D. Zhang, J. Zhang, H. Wang, C. Cui, W. Jiao, J. Gao and Y. Liu, *J. Alloy. Compd.*, 2019, **806**, 1419-1429.
11. R. M. Abdel Hameed and S. S. Medany, *Int. J. Hydrogen. Energ.*, 2017, **42**, 24117-24130.
12. H. M. Abd El-Lateef, M. M. Khalaf and I. M. A. Mohamed, *Ceram. Int.*, 2020, **46**, 20376-20384.
13. H. M. Abd El-Lateef, N. F. Almulhim, A. A. Alaulamie, M. M. Saleh and I. M. A. Mohamed, *Colloid Surface A*, 2020, **585**, 124092.
14. S. Lu, M. Hummel, Z. Gu, Y. Wang, K. Wang, R. Pathak, Y. Zhou, H. Jia, X. Qi, X. Zhao, B. B. Xu and X. Liu, *ACS Sustain. Chem. Eng.*, 2021, **9**, 1703-1713.
15. L. Xia, Y. Liao, Y. Qing, H. Xu, Z. Gao, W. Li and Y. Wu, *ACS Appl. Energ. Mater.*, 2020, **3**, 2996-3004.
16. K. Ye, H. Zhang, L. Zhao, X. Huang, K. Cheng, G. Wang and D. Cao, *New J. Chem.*, 2016, **40**, 8673-8680.
17. W. Yang, X. Yang, B. Li, J. Lin, H. Gao, C. Hou and X. Luo, *J. Mater. Chem. A*, 2019, **7**, 26364-26370.
18. C. Lin, Z. Gao, F. Zhang, J. Yang, B. Liu and J. Jin, *J. Mater. Chem. A*, 2018, **6**, 13867-13873.
19. J. Chen, S. Ci, G. Wang, N. Senthikumar, M. Zhang, Q. Xu and Z. Wen, *ChemElectroChem*, 2019, **6**, 5313-5320.
20. Q. Gan, X. Cheng, J. Chen, D. Wang, B. Wang, J. Tian, T. T. Isimjan and X. Yang, *Electrochim. Acta*, 2019, **301**, 47-54.
21. Z. Yue, S. Yao, Y. Li, W. Zhu, W. Zhang, R. Wang, J. Wang, L. Huang, D. Zhao and J. Wang, *Electrochim. Acta*, 2018, **268**, 211-217.
22. G. Ma, Q. Xue, J. Zhu, X. Zhang, X. Wang, H. Yao, G. Zhou and Y. Chen, *Appl. Catal. B.*, 2020, **265**, 118567.
23. Y. Xu, X. Chai, T. Ren, S. Yu, H. Yu, Z. Wang, X. Li, L. Wang and H. Wang, *Chem. Commun.*, 2020, **56**, 2151-2154.
24. J. Xie, W. Liu, F. Lei, X. Zhang, H. Qu, L. Gao, P. Hao, B. Tang and Y. Xie, *Chem. Eur. J.*, 2018, **24**, 18408-18412.
25. W. Zhu, Z. Yue, W. Zhang, N. Hu, Z. Luo, M. Ren, Z. Xu, Z. Wei, Y. Suo and J. Wang, *J. Mater. Chem. A*, 2018, **6**, 4346-4353.
26. C. B. Sun, M. W. Guo, S. S. Siwal and Q. B. Zhang, *J. Catal.*, 2020, **381**, 454-461.

27. J.-H. Yang, X. Song, X. Zhao, Y. Wang, Y. Yang and L. Gao, *Int. J. Hydrogen. Energ.*, 2019, **44**, 16305-16314.
28. H. Xu, Y. Liao, Z. Gao, Y. Qing, Y. Wu and L. Xia, *J. Mater. Chem. A*, 2021, **9**, 3418-3426.
29. H. Yang, M. Yuan, Z. Sun, D. Wang, L. Lin, H. Li and G. Sun, *ACS Sustain. Chem. Eng.*, 2020, **8**, 8348-8355.
30. J. Xie, W. Liu, X. Zhang, Y. Guo, L. Gao, F. Lei, B. Tang and Y. Xie, *ACS Mater. Lett.*, 2019, **1**, 103-110.
31. R.-Q. Li, Q. Liu, Y. Zhou, M. Lu, J. Hou, K. Qu, Y. Zhu and O. Fontaine, *J. Mater. Chem. A*, 2021, **9**, 4159-4166.
32. Q. Zhang, F. M. D. Kazim, S. Ma, K. Qu, M. Li, Y. Wang, H. Hu, W. Cai and Z. Yang, *Appl. Catal. B.*, 2021, **280**, 119436.
33. M. Yuan, X. Guo, N. Li and H. Pang, *J. Colloid Interf. Sci.*, 2021, **589**, 56-64.
34. J. Zhang, F. Xing, H. Zhang and Y. Huang, *Dalton T.*, 2020, **49**, 13962-13969.
35. P. Hao, W. Zhu, F. Lei, X. Ma, J. Xie, H. Tan, L. Li, H. Liu and B. Tang, *Nanoscale*, 2018, **10**, 20384-20392.
36. J. R. Barbosa, C. H. Paranhos, O. C. Alves, N. R. Checca, J. P. Serna, A. L. Rossi and J. C. M. Silva, *Electrochim. Acta*, 2020, **355**, 136752.
37. N. Muthuchamy, S. Jang, J. C. Park, S. Park and K. H. Park, *ACS Sustain. Chem. Eng.*, 2019, **7**, 15526-15536.
38. P. Mirzaei, S. Bastide, A. Dassy, R. Bensimon, J. Bourgon, A. Aghajani, C. Zlotea, D. Muller-Bouvet and C. Cachet-Vivier, *Electrochim. Acta*, 2019, **297**, 715-724.
39. S. Qian, Z. Rao, Y. Liu, J. Yan, B. Fan, Y. Gui and F. Guo, *Electrochim. Acta*, 2020, **330**, 135211.
40. Y. Feng, X. Wang, P. Dong, J. Li, L. Feng, J. Huang, L. Cao, L. Feng, K. Kajiyoshi and C. Wang, *Sci. Rep.*, 2019, **9**, 15965.
41. Z. Cao, T. Zhou, X. Ma, Y. Shen, Q. Deng, W. Zhang and Y. Zhao, *ACS Sustain. Chem. Eng.*, 2020, **8**, 11007-11015.
42. X. Gao, Y. Wang, W. Li, F. Li, H. Arandiyani, H. Sun and Y. Chen, *Electrochim. Acta*, 2018, **283**, 1277-1283.
43. D. Wei, W. Tang, N. Ma and Y. Wang, *J. Alloy. Compd.*, 2021, **874**, 159945.
44. W. Shi, R. Ding, X. Li, Q. Xu and E. Liu, *Electrochim. Acta*, 2017, **242**, 247-259.
45. J.-Y. Zhang, T. He, M. Wang, R. Qi, Y. Yan, Z. Dong, H. Liu, H. Wang and B. Y. Xia, *Nano Energy*, 2019, **60**, 894-902.
46. R. K. Singh, P. Subramanian and A. Schechter, *ChemElectroChem*, 2017, **4**, 1037-1043.
47. Z. Lv, Z. Li, X. Tan, Z. Li, R. Wang, M. Wen, X. Liu, G. Wang, G. Xie and L. Jiang, *Appl. Surf. Sci.*, 2021, **552**, 149514.
48. W. Shi, X. Sun, R. Ding, D. Ying, Y. Huang, Y. Huang, C. Tan, Z. Jia and E. Liu, *Chem. Commun.*, 2020, **56**, 6503-6506.
49. F. Wang, D. Zhao, L. Zhang, L. Fan, X. Zhang and S. Hu, *Nanomaterials (Basel)*, 2019, **9**, 1583.
50. S. Hu, C. Feng, S. Wang, J. Liu, H. Wu, L. Zhang and J. Zhang, *ACS Appl. Mater. Interfaces*, 2019, **11**, 13168-13175.
51. Z. Zhao, J. Zhao, H. Wang, X. Li, L. Yang, Z. Zhao, X. Liu, Y. Liu, P. Liu and Z. Cai, *Int. J. Hydrogen. Energ.*, 2020, **45**, 14199-14207.
52. Q. Liu, L. Xie, F. Qu, Z. Liu, G. Du, A. M. Asiri and X. Sun, *Inorg. Chem. Front.*, 2017, **4**, 1120-1124.

53. D. Yang, Y. Gu, X. Yu, Z. Lin, H. Xue and L. Feng, *ChemElectroChem*, 2018, **5**, 659-664.
54. Y. Tong, L. Chen, P. J. Dyson and Z. Fei, *J. Mater. Sci.*, 2021, **56**, 17709-17720.
55. L. Fei, H. Sun, R. Ran, W. Zhou and Z. Shao, *Ind. Eng. Chem. Res.*, 2021, **60**, 1185-1193.
56. R. Ding, X. Li, W. Shi, Q. Xu, L. Wang, H. Jiang, Z. Yang and E. Liu, *Electrochim. Acta*, 2016, **222**, 455-462.
57. D. Liu, T. Liu, L. Zhang, F. Qu, G. Du, A. M. Asiri and X. Sun, *J. Mater. Chem. A*, 2017, **5**, 3208-3213.
58. Z. Zhao, L. Yang, Z. Wang, L. Wang, G. Guo, J. Chen, Y. Li, C. Wang, J. Zhao and Z. Cai, *J. Electrochem. Soc.*, 2020, **167**, 126514.
59. T.-H. Wu, Y.-C. Lin, B.-W. Hou and W.-Y. Liang, *Catalysts*, 2020, **10**, 1280.
60. M. Liu, Y. Jiao, S. Zhan and H. Wang, *Catal. Today*, 2020, **355**, 596-601.
61. J.-Y. Zhang, X. Tian, T. He, S. Zaman, M. Miao, Y. Yan, K. Qi, Z. Dong, H. Liu and B. Y. Xia, *J. Mater. Chem. A*, 2018, **6**, 15653-15658.
62. L. Zhao, Y. Chang, M. Jia, J. Jia and Z. Wen, *J. Alloy. Compd.*, 2021, **852**, 156751.
63. P. Xiong, X. Ao, J. Chen, J.-G. Li, L. Lv, Z. Li, M. Zondode, X. Xue, Y. Lan and C. Wang, *Electrochim. Acta*, 2019, **297**, 833-841.
64. X. Ji, Y. Zhang, Z. Ma and Y. Qiu, *ChemSusChem*, 2020, **13**, 5004-5014.
65. N. Wu, R. Guo, X. Zhang, N. Gao, X. Chi, D. Cao and T. Hu, *J. Alloy. Compd.*, 2021, **870**, 159408.
66. S. Wang, P. Xu, J. Tian, Z. Liu and L. Feng, *Electrochim. Acta*, 2021, **370**, 137755.
67. G. Qian, J. Chen, L. Luo, H. Zhang, W. Chen, Z. Gao, S. Yin and P. Tsiakaras, *ACS Appl. Mater. Interfaces*, 2020, **12**, 38061-38069.
68. F. Shen, W. Jiang, G. Qian, W. Chen, H. Zhang, L. Luo and S. Yin, *J. Power. Sources*, 2020, **458**, 228014.
69. X. Zhuo, W. Jiang, G. Qian, J. Chen, T. Yu, L. Luo, L. Lu, Y. Chen and S. Yin, *ACS Appl. Mater. Interfaces*, 2021, **13**, 35709-35718.
70. G. Li, J. Wang, J. Yu, H. Liu, Q. Cao, J. Du, L. Zhao, J. Jia, H. Liu and W. Zhou, *Appl. Catal. B.*, 2020, **261**, 118147.
71. Z. Liu, C. Zhang, H. Liu and L. Feng, *Appl. Catal. B.*, 2020, **276**, 119165.
72. Y. Liu, M. Huang, J. Zhao, M. Lu, X. Zhou, Q. Lin, P. Wang and J. Zhu, *J. Electrochem. Soc.*, 2020, **167**, 066520.
73. G. Das, R. M. Tesfaye, Y. Won and H. H. Yoon, *Electrochim. Acta*, 2017, **237**, 171-176.
74. Y. Cheng, F. Liao, H. Dong, H. Wei, H. Geng and M. Shao, *J. Power. Sources*, 2020, **480**, 229151.
75. H. Wang, L. Zhang, H. Jiang, P. Kannan, R. Wang, P. Subramanian and S. Ji, *J. Alloy. Compd.*, 2021, **870**, 159486.
76. B. Xu, X. Yang, X. Liu, W. Song, Y. Sun, Q. Liu, H. Yang and C. Li, *J. Power. Sources*, 2020, **449**, 227585.
77. J. Li, C. Yao, X. Kong, Z. Li, M. Jiang, F. Zhang and X. Lei, *ACS Sustain. Chem. Eng.*, 2019, **7**, 13278-13285.
78. H. Liu, Z. Liu and L. Feng, *Nanoscale*, 2019, **11**, 16017-16025.
79. K. Wang, W. Huang, Q. Cao, Y. Zhao, X. Sun, R. Ding, W. Lin, E. Liu and P. Gao, *Chem. Eng. J.*, 2022, **427**, 130865.
80. L. Yan, Y. Sun, E. Hu, J. Ning, Y. Zhong, Z. Zhang and Y. Hu, *J. Colloid Interf. Sci.*, 2019, **541**, 279-286.
81. H. Xu, K. Ye, K. Zhu, Y. Gao, J. Yin, J. Yan, G. Wang and D. Cao, *ACS Sustain. Chem. Eng.*, 2020,

- 8**, 16037-16045.
82. X. Xu, P. Du, T. Guo, B. Zhao, H. Wang and M. Huang, *ACS Sustain. Chem. Eng.*, 2020, **8**, 7463-7471.
83. H. Liu, Z. Liu, F. Wang and L. Feng, *Chem. Eng. J.*, 2020, **397**, 125507.
84. Y. Zheng, P. Tang, X. Xu and X. Sang, *J. Solid State Chem.*, 2020, **292**, 121644.
85. S. Wang, L. Zhao, J. Li, X. Tian, X. Wu and L. Feng, *J. Energy Chem.*, 2022, **66**, 483-492.
86. L. Lv, Z. Li, H. Wan and C. Wang, *J. Colloid Interf. Sci.*, 2021, **592**, 13-21.
87. L. Sha, T. Liu, K. Ye, K. Zhu, J. Yan, J. Yin, G. Wang and D. Cao, *J. Mater. Chem. A*, 2020, **8**, 18055-18063.
88. L. Meng, L. Li, J. Wang, S. Fu, Y. Zhang, J. Li, C. Xue, Y. Wei and G. Li, *Electrochim. Acta*, 2020, **350**, 136382.
89. Q. Xu, T. Yu, J. Chen, G. Qian, H. Song, L. Luo, Y. Chen, T. Liu, Y. Wang and S. Yin, *ACS Appl. Mater. Interfaces*, 2021, **13**, 16355-16363.
90. Q. Xu, G. Qian, S. Yin, C. Yu, W. Chen, T. Yu, L. Luo, Y. Xia and P. Tsiakaras, *ACS Sustain. Chem. Eng.*, 2020, **8**, 7174-7181.
91. R.-Q. Li, S. Li, M. Lu, Y. Shi, K. Qu and Y. Zhu, *J. Colloid Interf. Sci.*, 2020, **571**, 48-54.
